# Supplementary material
Source: MDPI journal article supplement (https://www.mdpi.com/2313-576X/9/4/81)
Supplement: s1 [file s1]

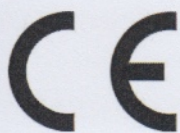

## Dichiarazione di conformità

Il sottoscritto Ing. Stefano Anselmi

In qualità di legale rappresentante della ditta **Inspira S.r.l.**

con sede in: via Gaggini, 1 – 28100 – Novara (NO)

Partita IVA: 02618950030

### Dichiara

che il responsabile della gestione del fascicolo tecnico è il sig. Paolo Valeri.

### Dichiara inoltre

che il prodotto: purificatore e sanificatore d'aria con tecnologia fotocatalitica

Modelli : OYA

Data di fabbricazione: 02/2021

È stato costruito rispettando le seguenti direttive e norme:

- Direttiva 2006/42 CE nota come "Direttiva macchine"
- Direttiva 2014/35/UE nota come "Direttiva bassa tensione"
- Direttiva 2014/53/UE nota come direttiva "RED"
- Direttiva 2014/30/UE nota come "Direttiva compatibilità elettromagnetica"
- Direttiva 2011/65/CE nota come "RoHS"
- Direttiva delegata 2015/863 che modifica la Direttiva 2011/65/CE
- Direttiva 2012/19/UE nota come "RAEE"
- Direttiva 2001/95/CE nota "Sicurezza generale dei prodotti"
- Direttiva 2009/125/CE relativa all'istituzione di un quadro per l'elaborazione di specifiche per la progettazione ecocompatibile dei prodotti connessi all'energia
- Norma IEC 61882:2016 metodo di analisi dei rischi secondo il metodo HAZOP
- Norma IEC 61511-1:2016 Functional safety - Safety instrumented systems for the process industry sector - Part 1: Framework, definitions, system, hardware and application programming requirements
- Norma UNI EN ISO 12100-1:2010 Principi generali di progettazione
- UNI EN ISO 7010:2020 Titolo: Segni grafici - Colori e segnali di sicurezza - Segnali di sicurezza registrati
- EN 61000-3-2:2014, EN 61000-3-3:2013, EN 55014-1:2017, EN 55014-2:2015
- EN 60335-2-65:2002+A1:2008+A2:2015, IEC 60335-1:2010+A1:2013+A2:2016

Ed è quindi conforme alle direttive e normative vigenti.

La presente dichiarazione di conformità è rilasciata sotto la responsabilità esclusiva del fabbricante.

Luogo: NOVARA

Data: 28 maggio 2021

Firma:

**INSPIRA s.r.l.**  
C.F. e P.I. 02618950030 - Tel. 0321/801260  
Via Gaggini, 1 - 28100 NOVARA  
AEEA di NO 247364
